# Supplementary material for: Inhibition of Liquid–Liquid Phase Separation for Breaking the Solubility Barrier of Amorphous Solid Dispersions to Improve Oral Absorption of Naftopidil
Source: MDPI journal article supplement (doi:10.3390/pharmaceutics14122664), 2022-11-30
Supplement: s1 [file s1]

Supplementary material File S1

## **Inhibition of Liquid-Liquid Phase Separation for Overcoming Dissolution Barrier of Amorphous Solid Dispersions to Improve Oral Absorption of Naftopidil**

Masafumi Fukiage<sup>1,\*</sup>, Kyosuke Suzuki<sup>2</sup>, Maki Matsuda<sup>3</sup>, Yohei Nishida<sup>4</sup>, Michinori Oikawa<sup>5</sup>, Takuya Fujita<sup>6</sup>, Kohsaku Kawakami<sup>7,\*</sup>

<sup>1</sup> Pharmaceutical R&D, Ono Pharmaceutical Co., LTD. 3-3-1, Sakurai, Shimamoto-cho, Mishima-gun, Osaka 618-8585, Japan

<sup>2</sup> Pharmaceutical and ADMET Research Department, Daiichi Sankyo RD Novare Co., Ltd., 1-16-13, Kitakasai, Edogawa-ku, Tokyo 134-8630, Japan

<sup>3</sup> Research & Development Division, Towa Pharmaceutical Co., Ltd., 134, Chudoji Minami-machi, Shimogyo-ku, Kyoto 600-8813, Japan

<sup>4</sup> Technology Research & Development, Sumitomo Dainippon Pharma Co., Ltd., 33-94, Enoki-cho, Suita, Osaka 564-0053, Japan

<sup>5</sup> Pharmaceutical Development Department, Sawai Pharmaceutical Co., Ltd., 5-2-30, Miyahara, Yodogawa-ku, Osaka 532-0003, Japan

<sup>6</sup> College of Pharmaceutical Sciences, Ritsumeikan University, 1-1-1 Noji-Higashi, Kusatsu, Shiga 525-8577, Japan

<sup>7</sup> Research Center for Functionals Materials, National Institute for Materials Science, 1-1 Namiki, Tsukuba, Ibaraki 305-0044

## 1. Physical Characterization of ASDs

X-ray powder diffraction (XRPD) measurements of ASDs were performed on a SmartLab X-RAY diffractometer (Rigaku, Tokyo, Japan). The voltage and the current were 40 kV and 200 mA, respectively. Data were collected at intervals of  $0.02^\circ$  (2 theta) with a scan speed  $30^\circ/\text{min}$ .

XRPD measurements proved that absence of diffraction peaks for all ASDs.

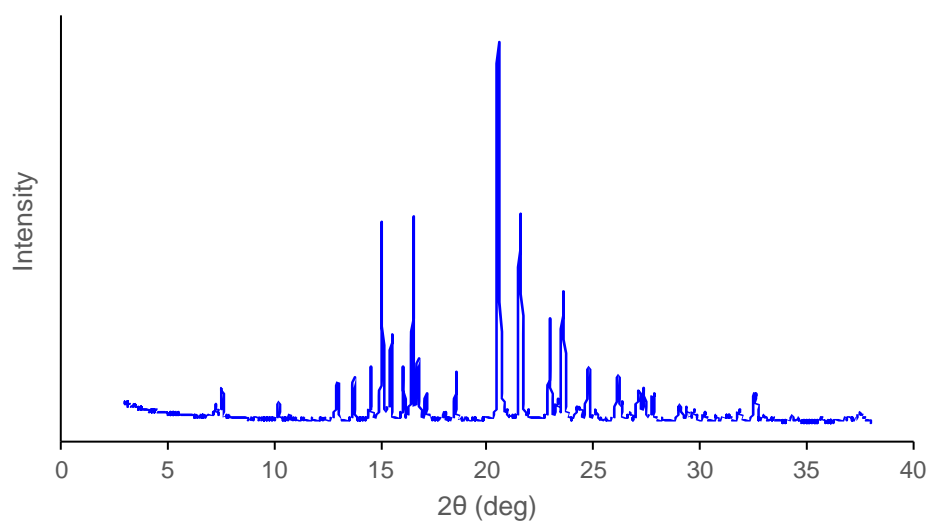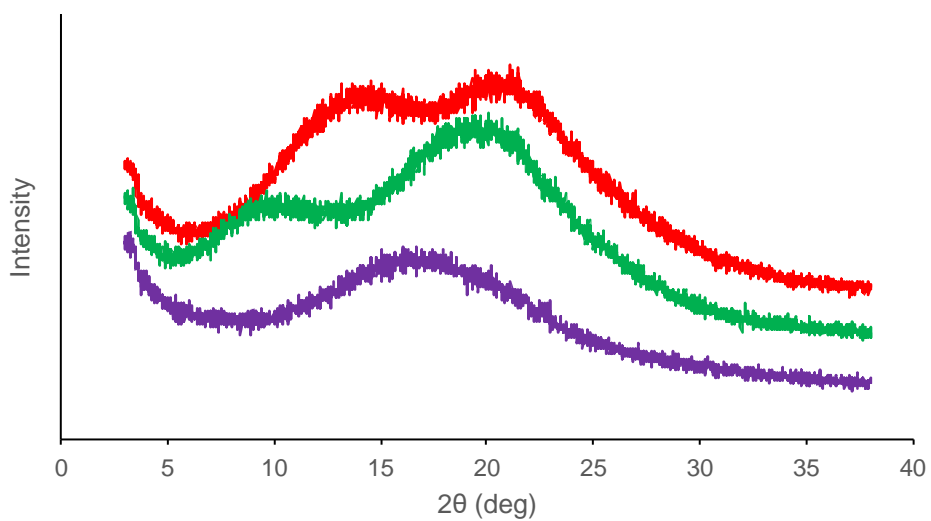

Differential scanning calorimetry (DSC) and temperature-modulated DSC (TM-DSC) were performed on a Discovery DSC (TA Instruments, New Castle, DE, USA), which calibrated monthly using indium and sapphire. Dry nitrogen was used as the inert gas at a flow rate of 50 mL/min. Approximately 2 mg of samples were measured using crimped aluminum pans.

No melting peaks were observed for all the ASDs in the DSC measurements. Single glass transition temperature ( $T_g$ ) were observed in DSC curves at 82, 85, and 118 °C for PVPVA, HPMCAS, and Eudragit ASDs, respectively. These  $T_g$ s were much higher than that for neat NFT glass (25 °C) and in between of those of NFT and polymer, suggesting molecular mixing of NFT and the polymers.

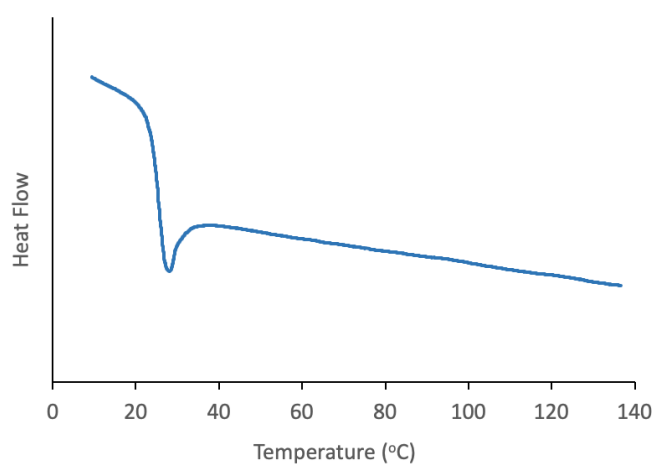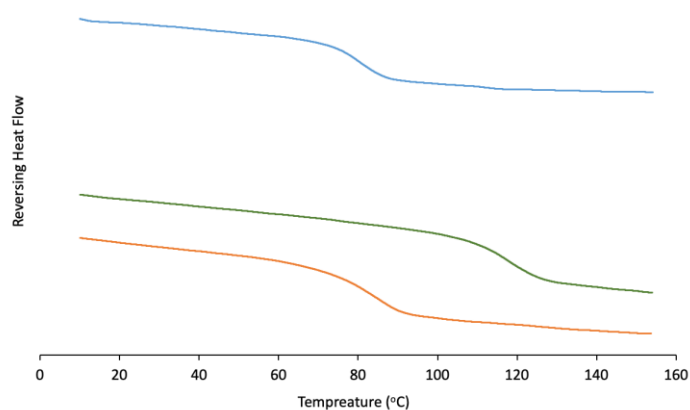

2. Detailed numerical data for the D/P/ study.

|              | Dose/well<br>(mg) | Apical Solution | Conc. ( $\mu$ g/mL) |         |             |         |        |       |       |        | Flux                       | Papp     |
|--------------|-------------------|-----------------|---------------------|---------|-------------|---------|--------|-------|-------|--------|----------------------------|----------|
|              |                   |                 | Apical              |         | Apical free |         | Basal  |       |       |        | $\mu$ g/cm <sup>2</sup> /s | cm/s     |
|              |                   |                 | 15 min              | 120 min | 15 min      | 120 min | 30 min | 60min | 90min | 120min |                            |          |
| PM           | 3.6               | TM              | 0.77                | 0.89    | 0.77        | 0.89    | 0.08   | 0.19  | 0.29  | 0.39   | 1.78E-04                   | 2.01E-04 |
| HPMCAS ASD   | 0.1               | TM              | 4.33                | 3.11    | 4.33        | 3.11    | 0.50   | 1.08  | 1.65  | 2.09   | 9.23E-04                   | 2.96E-04 |
|              | 0.4               | TM              | 19.20               | 16.25   | 19.20       | 16.25   | 2.69   | 5.27  | 7.85  | 9.89   | 4.18E-03                   | 2.57E-04 |
|              | 1.2               | TM              | 26.85               | 25.05   | 26.85       | 25.05   | 3.93   | 7.64  | 11.00 | 14.12  | 5.86E-03                   | 2.34E-04 |
|              | 3.6               | TM              | 34.20               | 34.25   | 34.20       | 34.25   | 4.44   | 8.12  | 11.39 | 15.64  | 6.37E-03                   | 1.86E-04 |
| Eudragit ASD | 0.1               | TM              | 2.04                | 1.33    | 2.04        | 1.33    | 0.34   | 0.74  | 1.12  | 1.40   | 6.10E-04                   | 4.61E-04 |
|              | 0.4               | TM              | 7.65                | 9.95    | 7.65        | 9.95    | 0.93   | 1.89  | 2.96  | 4.27   | 1.91E-03                   | 1.92E-04 |
|              | 1.2               | TM              | 5.00                | 8.00    | 5.00        | 8.00    | 0.64   | 1.29  | 2.06  | 2.84   | 1.27E-03                   | 1.59E-04 |
|              | 3.6               | TM              | 1.94                | 2.44    | 1.94        | 2.44    | 0.28   | 0.54  | 0.79  | 1.01   | 4.26E-04                   | 1.75E-04 |
| PM           | 3.6               | SIF             | 23.31               | 24.66   | 1.47        | 1.56    | 0.26   | 0.55  | 0.84  | 1.13   | 5.00E-04                   | 2.03E-05 |
| HPMCAS ASD   | 0.1               | SIF             | 7.19                | 7.99    | 0.45        | 0.50    | 0.08   | 0.22  | 0.36  | 0.49   | 2.34E-04                   | 2.94E-05 |
|              | 0.4               | SIF             | 34.35               | 40.25   | 2.17        | 2.54    | 0.32   | 0.73  | 1.20  | 1.61   | 7.45E-04                   | 1.85E-05 |
|              | 1.2               | SIF             | 105.60              | 119.55  | 6.66        | 7.54    | 0.87   | 1.61  | 2.90  | 3.97   | 1.83E-03                   | 1.53E-05 |
|              | 3.6               | SIF             | 425.70              | 443.70  | 26.86       | 27.99   | 1.83   | 4.61  | 7.53  | 9.88   | 4.67E-03                   | 1.05E-05 |
| Eudragit ASD | 0.1               | SIF             | 7.24                | 7.75    | 0.46        | 0.49    | 0.10   | 0.24  | 0.36  | 0.48   | 2.18E-04                   | 2.82E-05 |
|              | 0.4               | SIF             | 29.55               | 34.95   | 1.86        | 2.20    | 0.29   | 0.71  | 0.99  | 1.40   | 6.22E-04                   | 1.78E-05 |
|              | 1.2               | SIF             | 73.35               | 101.85  | 4.63        | 6.43    | 0.43   | 1.01  | 1.55  | 2.40   | 1.11E-03                   | 1.09E-05 |
|              | 3.6               | SIF             | 48.15               | 58.50   | 3.04        | 3.69    | 0.26   | 0.58  | 0.80  | 1.02   | 4.29E-04                   | 7.34E-06 |
